# Supplementary material for: Highly robust nanostructured carbon films by thermal reconfiguration of ionomer binding
Source: Royal Society of Chemistry journal article supplement (doi:10.1039/d0ta07861a), 2020-01-01
Supplement: d0ta07861a1.pdf [file d0ta07861a1.pdf]

1

## Supplementary Information for

2

# Highly Robust Nanostructured Carbon Films by Thermal Reconfiguration of Ionomer Binding

3

4

5

**Jae-Bum Pyo<sup>‡a</sup>, Ji Hun Kim<sup>‡a</sup>, and Taek-Soo Kim<sup>\*a</sup>**

6

<sup>a</sup> Department of Mechanical Engineering, KAIST, 291 Daehak-ro, Yuseong-gu,  
Daejeon 34141, Korea;

7

8

9

<sup>‡</sup>These authors contributed equally to this work.

10

<sup>\*</sup>Corresponding author. E-Mail: [tskim1@kaist.ac.kr](mailto:tskim1@kaist.ac.kr)

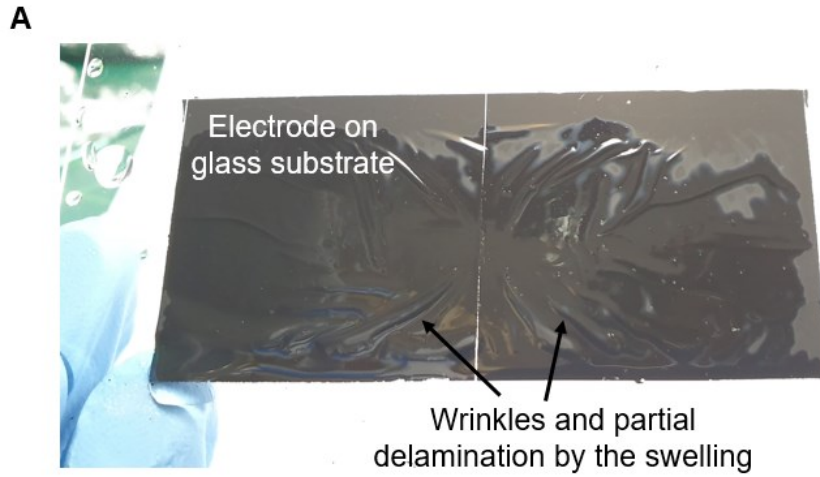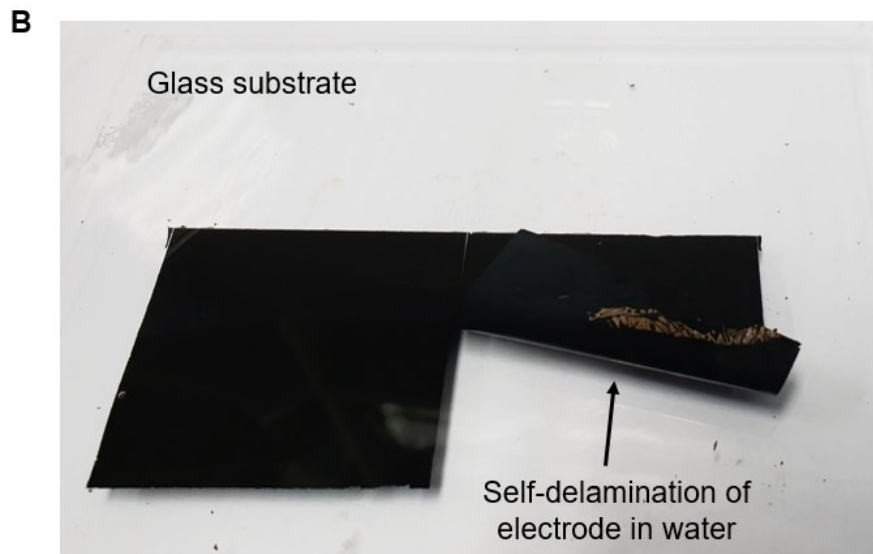

1  
2  
3  
4  
5

**Fig. S1 Swelling-induced electrode separation.** (A) Wrinkled and partially delaminated electrodes due to swelling mismatch. (B) The self-delaminated area became broader as the moisture absorption time increased.

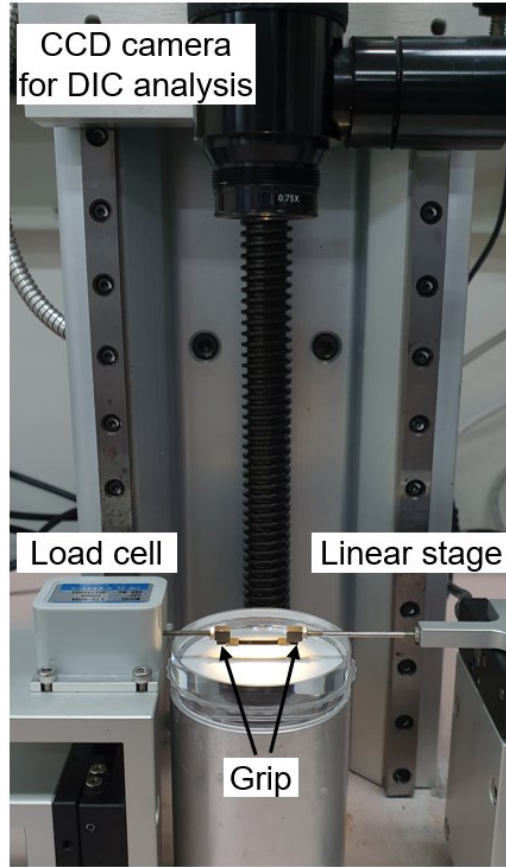

1

2

**Fig. S2 Pseudo free-standing tensile testing system.**

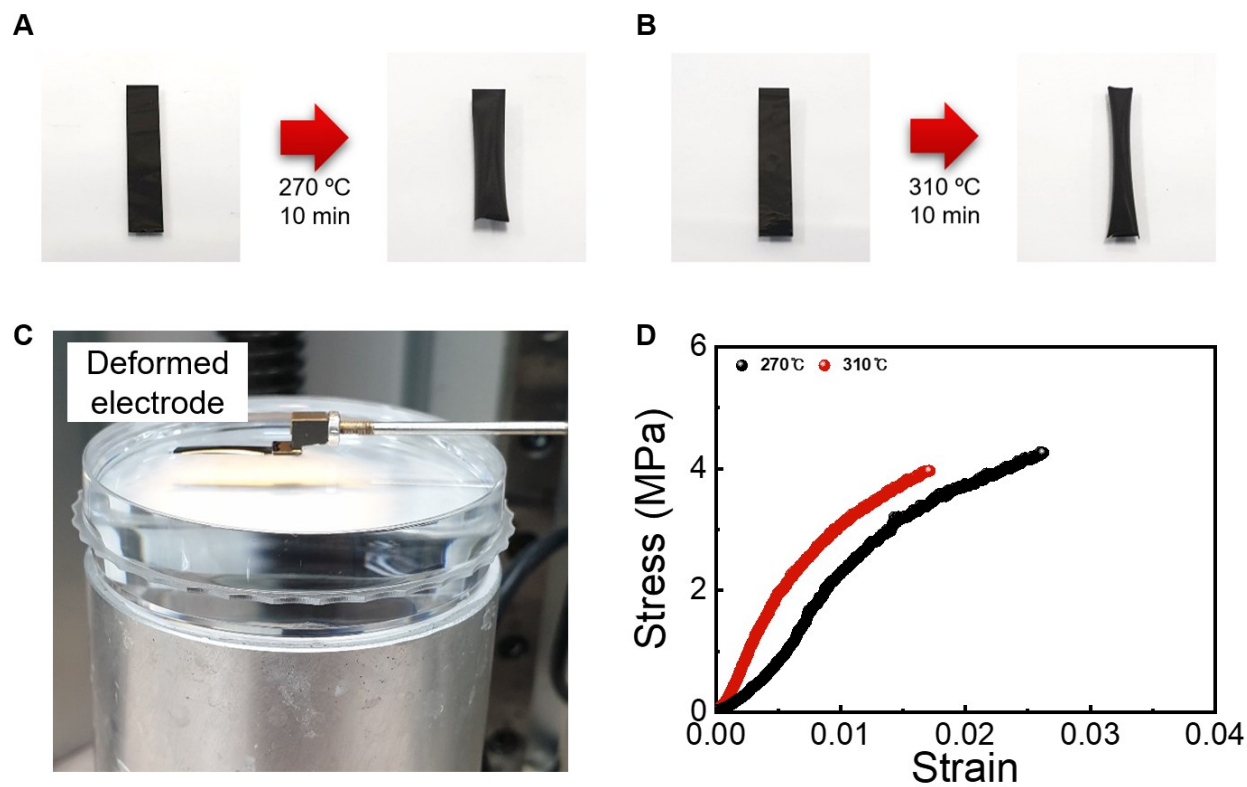

1  
2  
3  
4  
5  
6

**Fig. S3 Thermally reconfigured electrodes above 230 °C and tensile testing results.** (A) Unstably deformed electrodes reconfigured at 270 °C and (B) 310 °C. (C) Deformed electrode attached on the gripping jig. (D) Stress-strain curves for the 270 °C electrode and the 310 °C electrode.

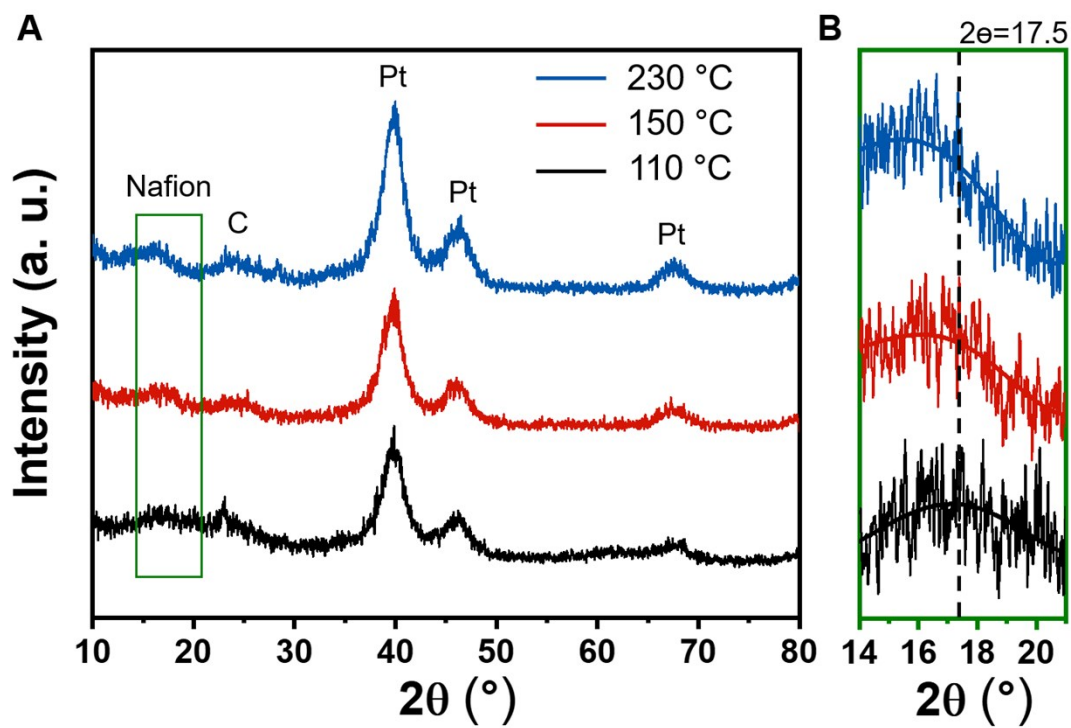

1  
2  
3  
4  
5  
6

**Fig. S4 XRD spectra as a function of the reconfiguration temperature. (A)** XRD spectrum of each electrode treated at different temperatures. **(B)** Clarified the change of the crystalline morphology of the Nafion binder as the reconfiguration temperature increased.

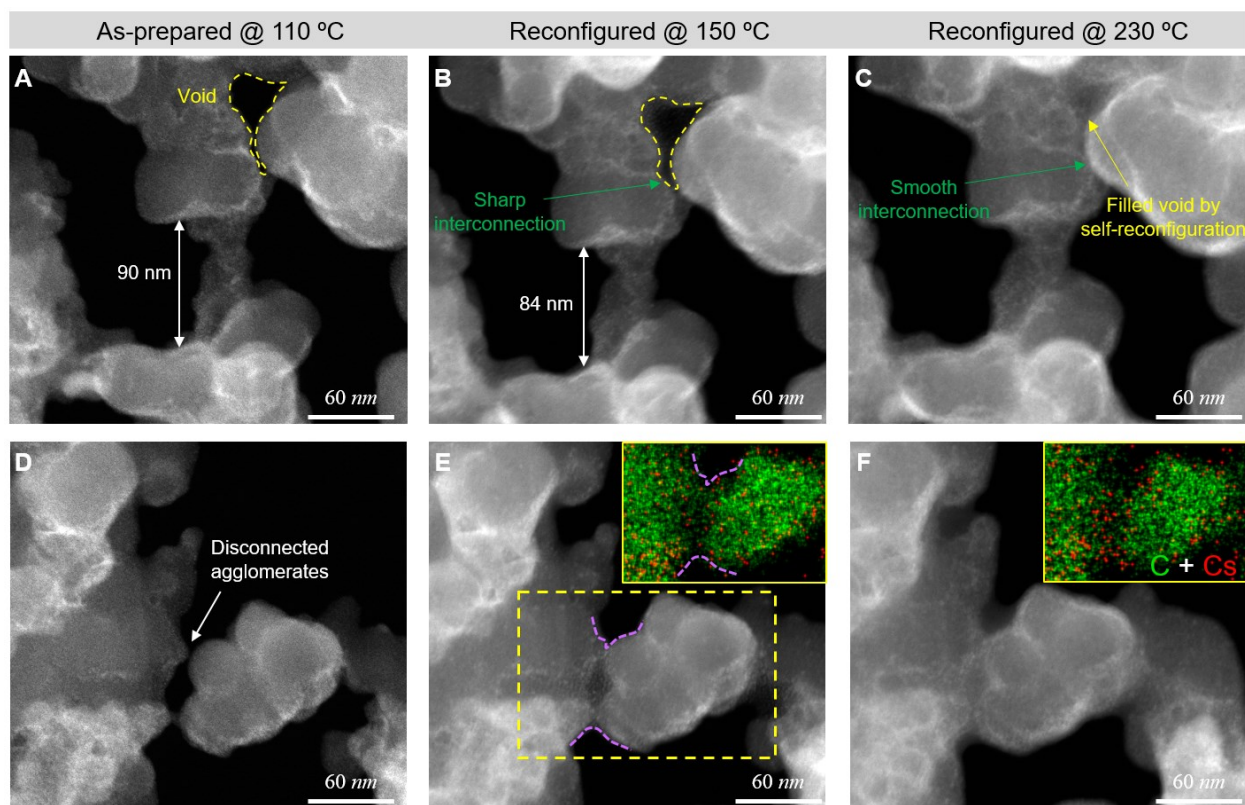

1  
2  
3  
4  
5  
6  
7  
8  
9  
10  
11

**Fig. S5 HAADF-STEM images of the electrode with increasing reconfiguration temperature.** (A) Nanostructure of the as-prepared electrode (110 °C). (B) Shortened distance between neighboring agglomerates reconfigured at 150 °C. (C) The reconfiguration at 230 °C promoted smooth interconnection and filled the small voids. (D) Neighboring agglomerates in the as-prepared electrode (110 °C) were initially disconnected. (E and F) The distance of disconnected agglomerates were shortened at 150 °C, but they still not sufficiently connected by Nafion binder (E). The inset shows elemental mapping of carbon (green) and cesium stained Nafion (red). Increasing the reconfiguration temperature to 230 °C allowed ionomer's melt flow in nanoscale (F).

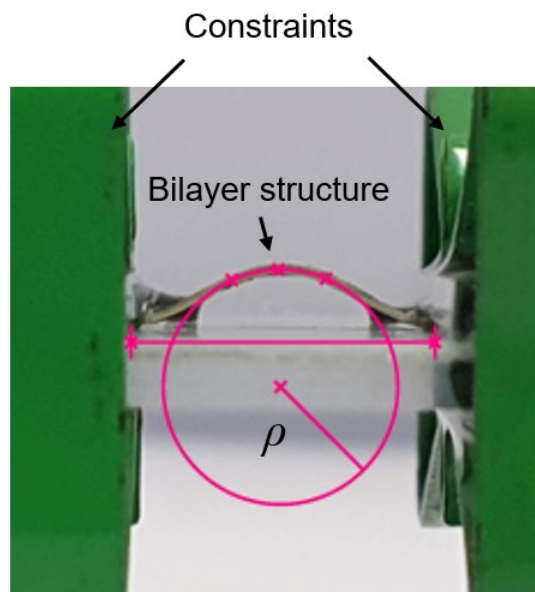

1  
2 **Fig. S6 Hygrothermal buckling of the bilayer structure.**

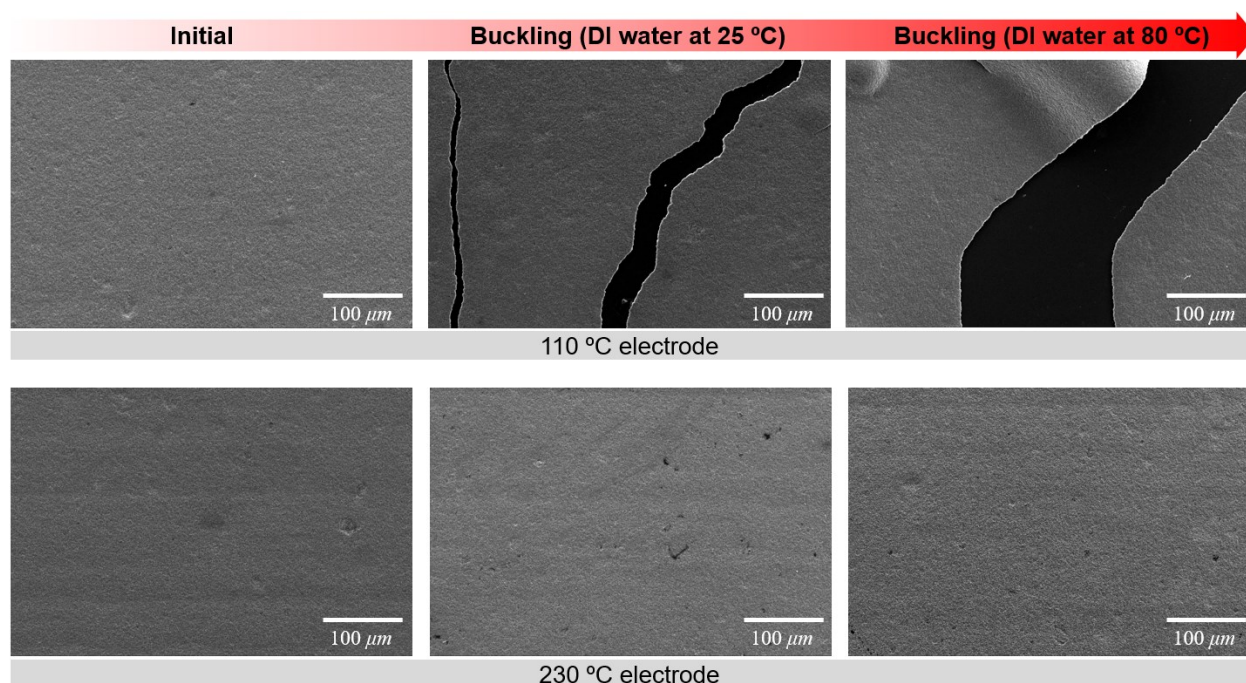

5  
6 **Fig. S7 Scanning electron microscopy images of 110 and 230 °C electrodes with**  
7 **increasing hygrothermal buckling loads.**

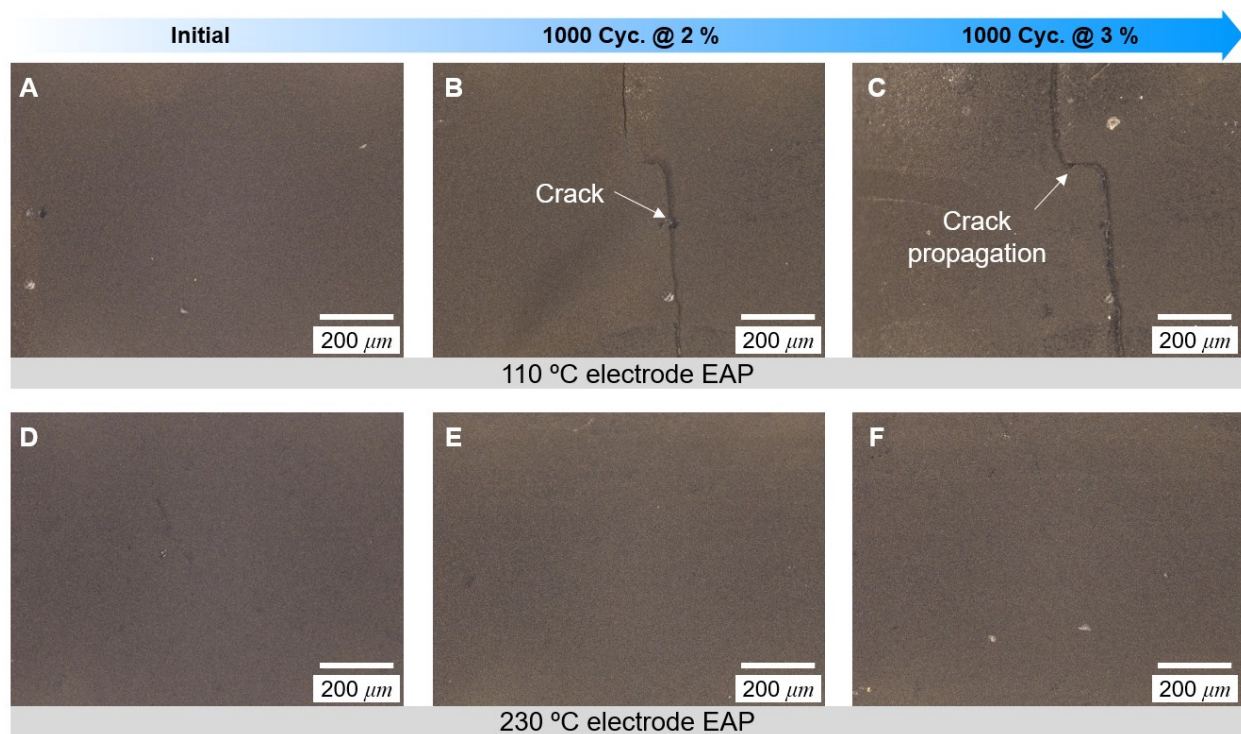

1  
2  
3  
4  
5  
6  
7  
8  
9

**Fig. S8 Optical microscope images of 110 and 230 °C electrode EAPs experiencing cyclic bending loads. (A–C)** Initially, the 110 °C electrode EAP was assembled without any defects (A). The cyclic loads at 2 % bending strain caused the electrode’s crack (B), and this crack propagated as the strain increased to 3 % (C). **(D–F)** Initially, the 230 °C electrode EAP was also assembled without any defects (D). This EAP demonstrated sufficient robustness to cyclic loads at 2 % (E) and 3 % (F) of bending strain, which is attributed to the higher mechanical strength.



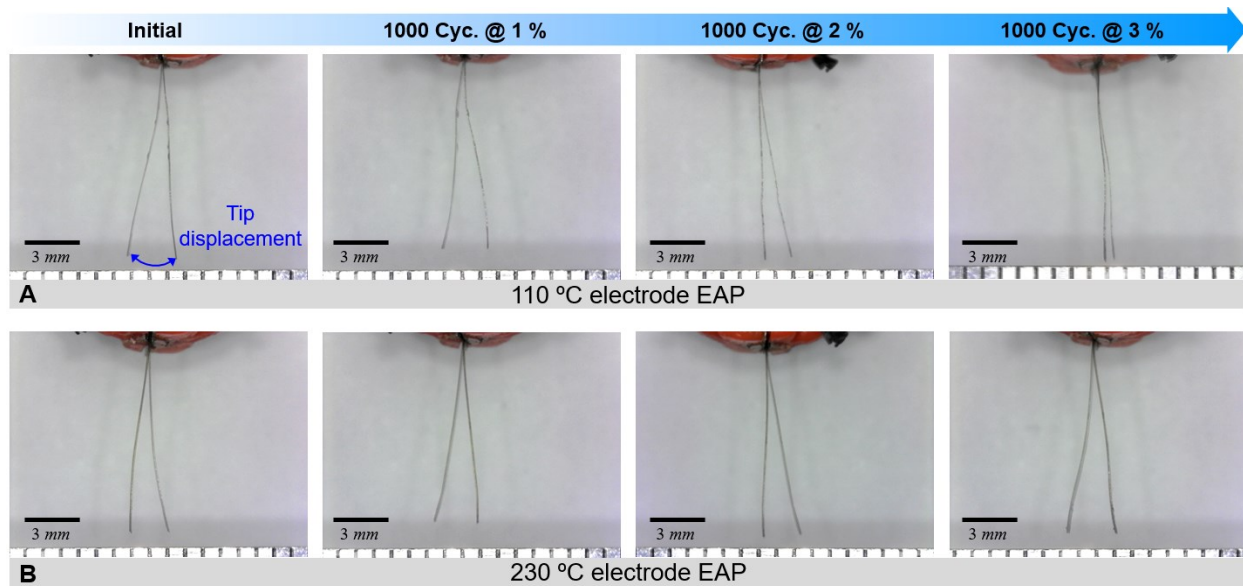

1  
2  
3  
4  
5  
6  
7

**Fig. S9 Actuation performance affected by cyclic bending loads. (A)** The 110 °C electrode EAP showed degradation of the actuating displacement as the cyclic bending strain increased. **(B)** The 230 °C electrode EAP maintained the initial actuating displacement, even after 3 % cyclic loads, which is attributed to sufficiently enhanced mechanical robustness.
